# Supplementary material for: Fabricating ferromagnetic MoS2-based composite exposed to simulated sunlight for sodium storage
Source: Royal Society of Chemistry journal article supplement (doi:10.1039/c9nr06180k), 2019-01-01
Supplement: c9nr06180k1.pdf [file c9nr06180k1.pdf]

## Fabricating Ferromagnetic MoS<sub>2</sub> Based Composite Exposed to Simulated Sunlight for Sodium Storage

Fusheng Liu,<sup>a,b</sup> Yaoyao Xiao,<sup>a,b</sup> Pinyu Han,<sup>a,b</sup> Yuting Liu,<sup>a,b</sup> Guohui Qin<sup>\*a,b</sup>

<sup>a</sup> State Key Laboratory Base for Eco-Chemical Engineering, College of Chemical Engineering, Qingdao University of Science and Technology, Qingdao 266042, Shandong, China

<sup>b</sup> Shandong Collaborative Innovation Center of Eco-Chemical Engineering, Qingdao 266042, China

Corresponding author.

E-mail: guohuiq163@sina.com

### Directory of contents

**Fig.S1** (a) The folded free standing active material circular disc, (b) The punched battery case, (c) The fabricated battery isolated from the air conditions, (d) The optical photograph of one fabricated battery exposed to simulated sunlight undergone LAND battery test and (e), (f) their corresponding amplified schematic pictures.

**Fig. S2** (a) N<sub>2</sub> adsorption and desorption isotherm and (b) pore size distribution of Fe@C@CQD@MoS<sub>2</sub>.

**Fig.S3** (a) Ultraviolet-visible light absorption spectrum of pure MoS<sub>2</sub> and Fe@C@CQD@MoS<sub>2</sub>, (b) The CV comparison images of Fe@C@CQD@MoS<sub>2</sub> and Fe@C@MoS<sub>2</sub>.

**Fig.S4** (a) and (b) high-magnification TEM image of Fe@C@CQD@MoS<sub>2</sub> nanoparticles after exposed to simulated sunlight 2 min and 200 cycles, (c) schematic evolution of the SEI reactivation.

**Fig. S5** XPS spectrum of 2H and 1T MoS<sub>2</sub> at different time.

**Fig. S6** Na migration pathways and barriers for Fe@C@MoS<sub>2</sub>.

**Fig. S7** The charge and discharge profiles of Fe@C@CQD@MoS<sub>2</sub> for repeated 100 cycles.

**Fig. S8** The SEM images of (a) Fe@C@MoS<sub>2</sub> (b) Fe@C@CQD@MoS<sub>2</sub> before and after 100 cycles .

**Fig. S9** The calculated SEI film variation according to comsol multiphysics model.

**Fig. S10** The TEM image comparison of (a) Fe@C@CQD@MoS<sub>2</sub> and (b) Fe@C@MoS<sub>2</sub> after 500<sup>th</sup> cycles at 500 mAg<sup>-1</sup>.

**Fig. S11** CV profiles of capacitive contribution at scan rates from 0.1 to 2 mV/s (a-e). (f) Specific capacities generated from battery contribution and capacitive contribution at different scan rates for Fe@C@CQD@MoS<sub>2</sub>.

**Fig. S12** The PL comparison files of Fe@C@CQD@MoS<sub>2</sub> and C@CQD@MoS<sub>2</sub>.

**Fig. S13** The temperature variation base on such Fe@C@CQD@MoS<sub>2</sub>, C@CQD@MoS<sub>2</sub> as time increases.

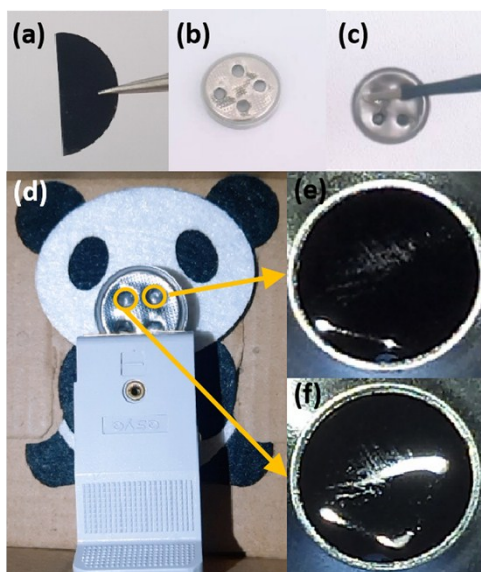

**Fig. S1** (a) The folded free standing active material circular disc, (b) The punched battery case, (c) The fabricated battery isolated from the air conditions, (d) The optical photograph of one fabricated battery exposed to simulated sunlight undergone LAND battery test and (e), (f) their corresponding amplified schematic pictures.

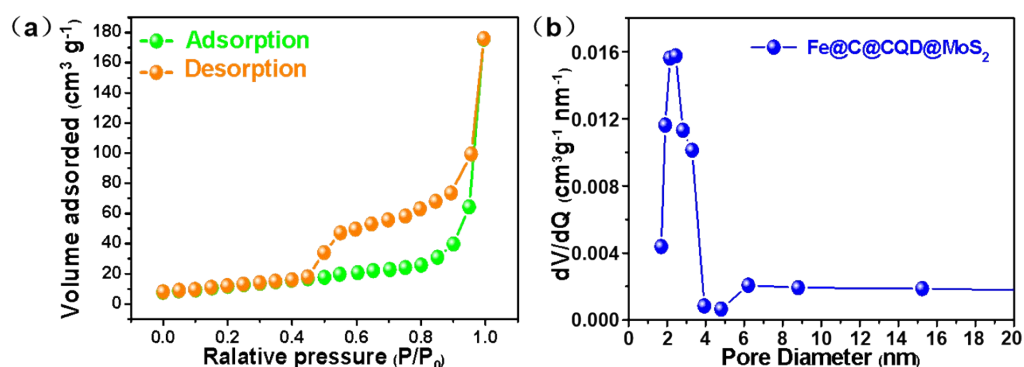

**Fig. S2** (a)  $N_2$  adsorption and desorption isotherm and (b) pore size distribution of  $Fe@C@CQD@MoS_2$ .

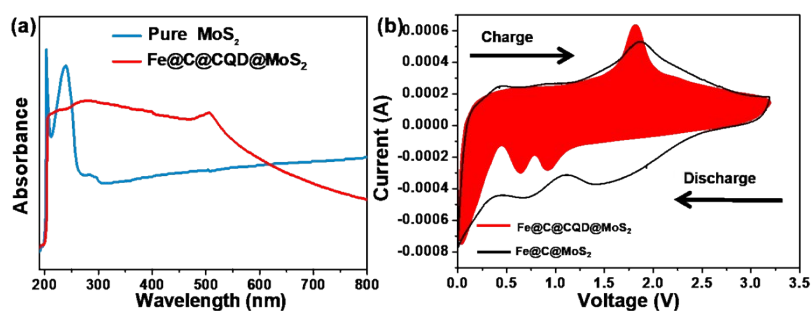

**Fig.S3** (a) Ultraviolet-visible light absorption spectrum of pure  $MoS_2$  and  $Fe@C@CQD@MoS_2$ , (b) The CV comparison images of  $Fe@C@CQD@MoS_2$  and  $Fe@C@MoS_2$ .

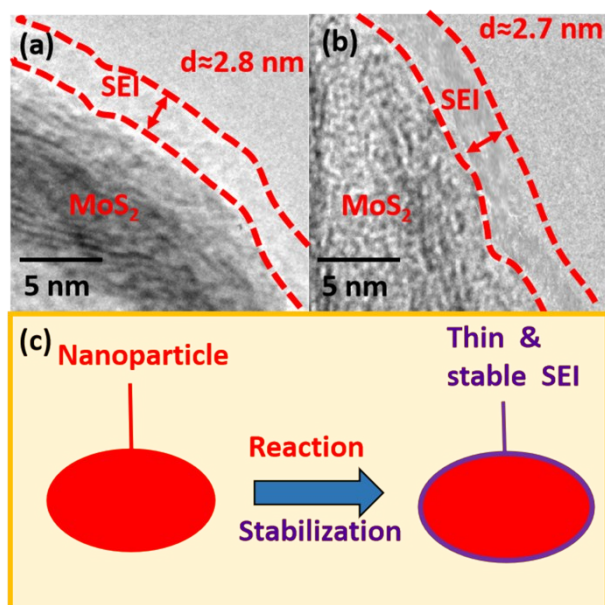

**Fig.S4** (a) and (b) high-magnification TEM image of Fe@C@CQD@MoS<sub>2</sub> nanoparticles after exposed to simulated sunlight 2 min and 200 cycles, (c) schematic evolution of the SEI reactivation.

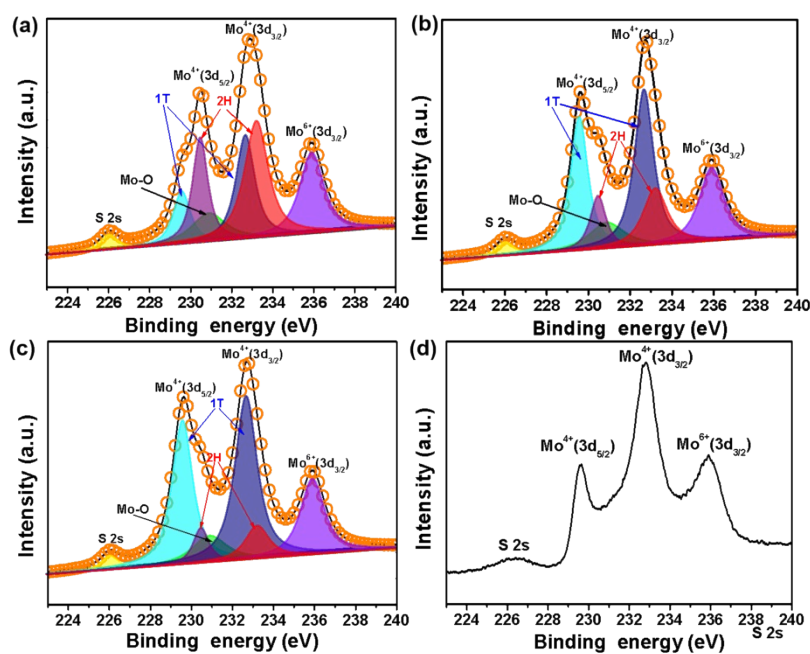

**Fig. S5** XPS spectrum of 2H and 1T MoS<sub>2</sub> at different time.

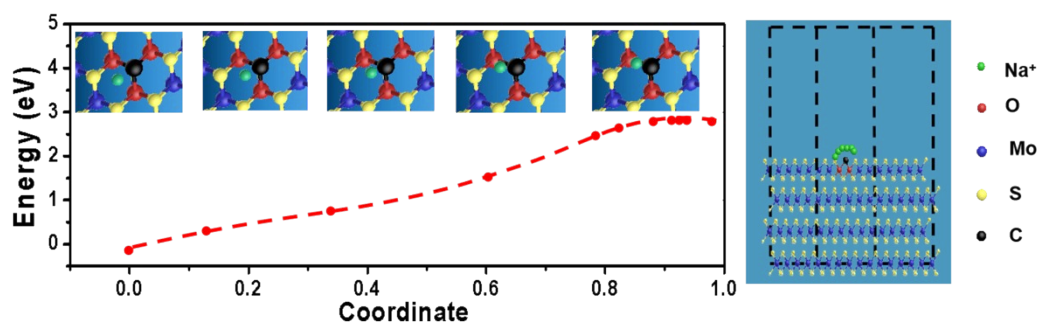

Fig. S6 Na migration pathways and barriers for Fe@C@MoS<sub>2</sub>.

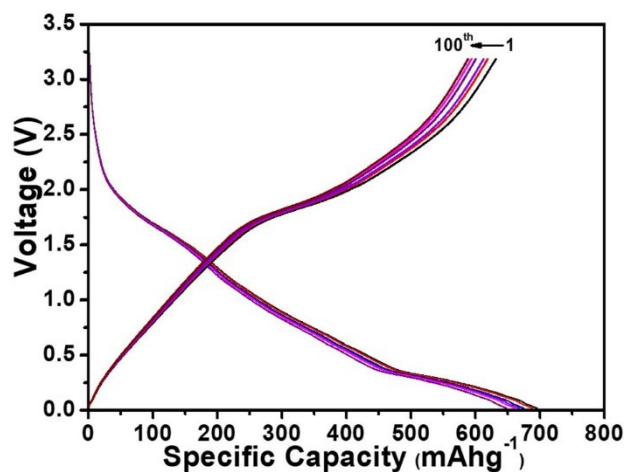

Fig. S7 The charge and discharge profiles of Fe@C@CQD@MoS<sub>2</sub> for repeated 100 cycles.

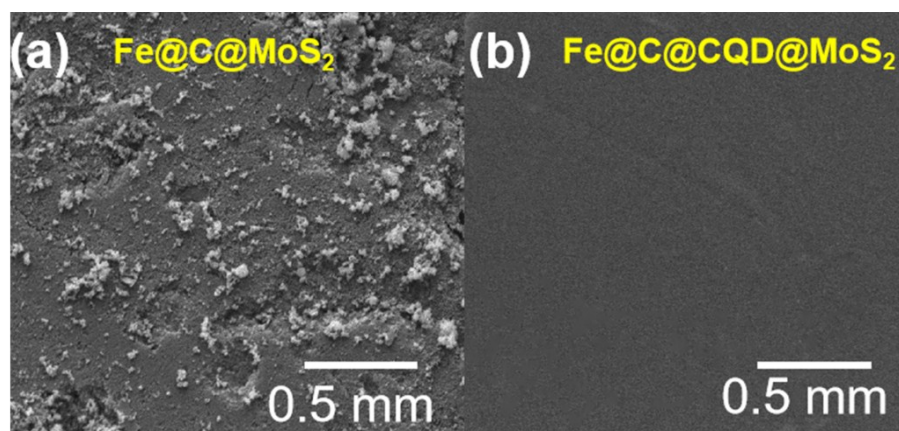

Fig. S8 The SEM images of collectors (a) Fe@C@MoS<sub>2</sub> (b) Fe@C@CQD@MoS<sub>2</sub>.

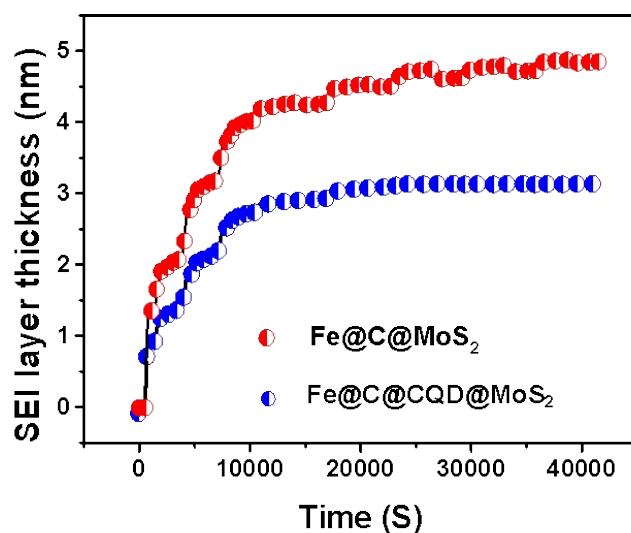

Fig. S9 The calculated SEI film variation according to comsol multiphysics model.

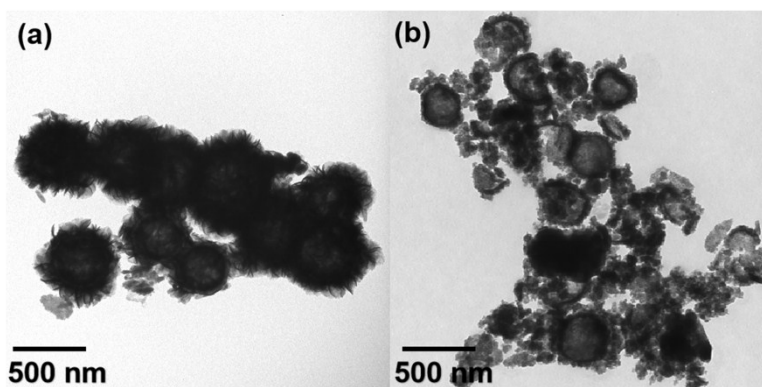

Fig. S10 The TEM image comparison of (a) Fe@C@CQD@MoS<sub>2</sub> and (b) Fe@C@MoS<sub>2</sub> after 500th cycles at 500 mAg<sup>-1</sup>.

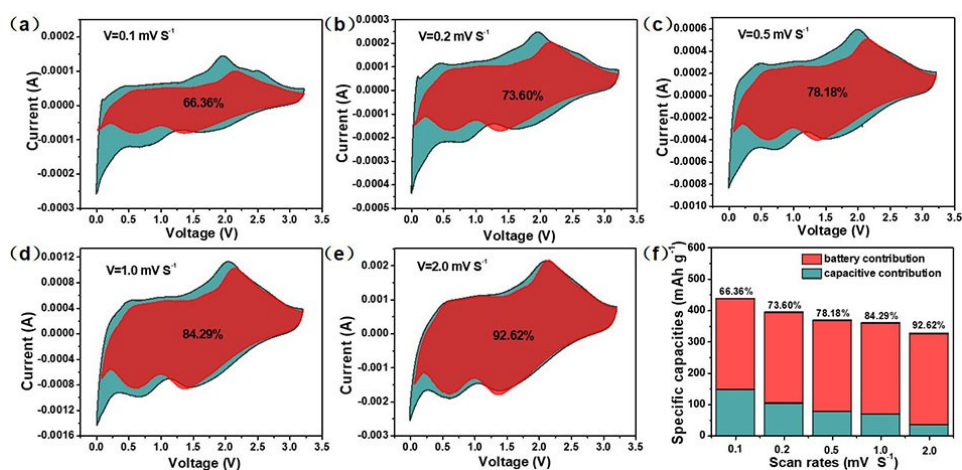

Fig. S11 CV profiles of capacitive contribution at scan rates from 0.1 to 2 mV/s (a-e). (f) Specific capacities generated from battery contribution and capacitive contribution at different scan rates for Fe@C@CQD@MoS<sub>2</sub>.

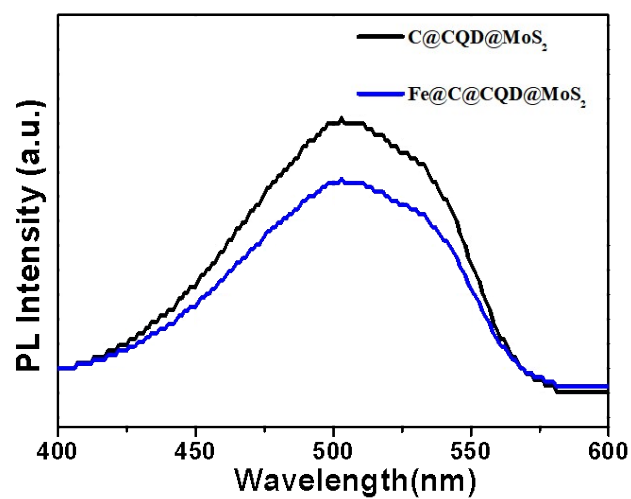

**Fig. S12** The PL comparison files of Fe@C@CQD@MoS<sub>2</sub> and C@CQD@MoS<sub>2</sub>.

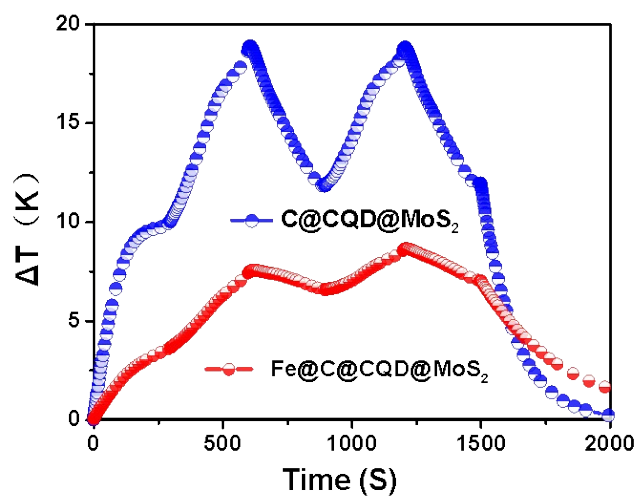

**Fig. S13** The temperature variation base on such Fe@C@CQD@MoS<sub>2</sub>, C@CQD@MoS<sub>2</sub> as time increases.
